## Literature Briefs

Myron B. Laver, M.D., Editor

*Literature Briefs were submitted by Drs. G. Battit, J. Bland, R. Clark, B. Dalton, A. Goldblatt, J. Jacoby, G. Rockwell. Briefs appearing elsewhere in this issue are part of this column.*

### Circulation

**VEIN GRAFTS FOR CORONARY ARTERY DISEASE** Saphenous vein grafts used for aorto-coronary bypass of occluded or stenosed arteries of eight subjects were examined at necropsy. The causes of death were described as cardiac (infarction and acute failure) in four cases, respiratory in two, gastric hemorrhage in one, and intestinal perforation in one. Postmortem coronary angiograms were made in seven cases. In all eight cases the vein grafts were sectioned transversely and longitudinally at different levels and the tissues were prepared for microscopic examination. The incidence and extent of thrombosis in the vein grafts (four cases) did not correlate with duration of postoperative survival, which ranged from two hours to ten months. Some of those who had survived longest had either organized, recanalized thrombosis or fresh thrombus formation. Phlebosclerosis, thought to have been pre-existing, was found in the grafts of the two shortest-term survivors. Both died of their heart disease.

Examination of the long-acting bypass grafts showed the following histologic changes: 1) thickening of the entire wall, mainly the result of intimal hypertrophy; 2) transient medial muscular hypertrophy succeeded by atrophy and fibrosis; 3) deposition of elastic fibers in the external vein wall. No aneurysmal dilatation was found in these specimens. (Martí, M., Bouchardy, B., and Cox, J. N.: *Aorto-coronary By-pass with Autogenous Saphenous Vein Grafts: Histopathological Aspects, Virchows Arch. Abt. A Path. Anat.* 252:255-266, 1971.)

**ABSTRACTER'S COMMENT:** This series was regrettably small. This report underlines the need for more information about selection of vein grafts, their intraoperative handling, and postoperative changes, particularly in view of the increasing number of such operations being performed.

### ATRIAL PACING AND VENTRICULAR FUNCTION IN ANGINA PECTORIS

The study was undertaken to ascertain whether a decrease in left ventricular performance consistently accompanies the appearance of pacing-induced angina and whether a fast-acting glycoside, ouabain, can prevent the hemodynamic abnormalities associated with angina. Eleven patients, ages 30 to 58 years, were studied. Coronary arteriography demonstrated greater than 50 per cent occlusion of at least one major coronary artery. Hemodynamic measurements included the left ventricular end-diastolic pressure (LVEDP), left ventricular stroke work index (LVSWI), stroke volume index (SVI), and peak rate of rise of left ventricular pressure (peak dp/dt). All these values were obtained during a control period and following atrial pacing at rates 10 to 20 beats faster than the control rates. Heart rate was subsequently increased in increments of 10 beats/min until angina appeared. Angina appeared during pacing in nine of 11 patients, when the mean control heart rate of 72/min was raised to 146/min. Mean control LVEDP was 11.5 mm Hg and fell slightly (mean: 1.8 mm Hg) following administration of ouabain. Before ouabain, LVEDP fell as the pacing rate was increased and tended to rise again at the maximum pacing rate. The response after ouabain was similar, although the control values (before pacing) were slightly lower. It is of interest that LVEDP rose transiently immediately upon cessation of pacing. Cardiac output did not change significantly at any
